# Supplementary material for: DPWSS: differentially private working set selection for training support vector machines
Source: PeerJ journal article supplement (doi:10.7717/peerj-cs.799), 2021-12-01
Supplement: CODE.zip [file data.xls]

## Sheet: data
dataset	shrinking	metrics	WSS2	DPWSS
				epsi=1 sigm=0.1	epsi=1 sigm=0.3	epsi=1 sigm=0.5	epsi=1 sigm=0.7	epsi=0.5 sigm=0.7	epsi=0.1 sigm=0.7
a1a	1	AUC	0.9117	0.9119	0.9117	0.9113	0.9116	0.9109	0.9123	0.0002	0	-0.0004	-0.0001	-0.0008	0.0006
		Accuracy	0.8623	0.8611	0.8629	0.8629	0.8592	0.8604	0.8636	-0.0012	0.0006	0.0006	-0.0031	-0.0019	0.0013
		Precision	0.7669	0.7654	0.7709	0.7709	0.76	0.7631	0.7667	-0.0015	0.004	0.004	-0.0069	-0.0038	-0.0002
		Recall	0.6329	0.6278	0.6304	0.6304	0.6253	0.6278	0.6405	-0.0051	-0.0025	-0.0025	-0.0076	-0.0051	0.0076
		F1	0.6935	0.6898	0.6936	0.6936	0.6861	0.6889	0.6979	-0.0037	0.0001	0.0001	-0.0074	-0.0046	0.0044
		Mcc	0.6104	0.6063	0.6115	0.6115	0.6012	0.6048	0.6148	-0.0041	0.0011	0.0011	-0.0092	-0.0056	0.0044
		obj	-540.57	-540.42	-540.45	-540.42	-539.95	-540.23	-540.06	0.15	0.12	0.15	0.62	0.34	0.51
		iter	8649	10535	6735	4316	3239	3529	3406	1.21806	0.778703	0.499017	0.374494	0.408024	0.393803
	0	AUC	0.9117	0.9116	0.9116	0.9119	0.9122	0.9111	0.9117	-0.0001	-0.0001	0.0002	0.0005	-0.0006	0
		Accuracy	0.8623	0.8623	0.8629	0.8629	0.8617	0.8623	0.8617	0	0.0006	0.0006	-0.0006	0	-0.0006
		Precision	0.7669	0.7685	0.7692	0.7709	0.7645	0.7685	0.7645	0.0016	0.0023	0.004	-0.0024	0.0016	-0.0024
		Recall	0.6329	0.6304	0.6329	0.6304	0.6329	0.6304	0.6329	-0.0025	0	-0.0025	0	-0.0025	0
		F1	0.6935	0.6926	0.6944	0.6936	0.6925	0.6926	0.6925	-0.0009	0.0009	0.0001	-0.001	-0.0009	-0.001
		Mcc	0.6104	0.61	0.612	0.6115	0.6088	0.61	0.6088	-0.0004	0.0016	0.0011	-0.0016	-0.0004	-0.0016
		obj	-540.57	-540.42	-540.44	-540.38	-540.12	-540.11	-540.2	0.15	0.13	0.19	0.45	0.46	0.37
		iter	7997	9566	6091	4252	3447	3379	3295	1.1962	0.761661	0.531699	0.431037	0.422533	0.41203
a5a	1	AUC	0.906	0.9059	0.9059	0.9057	0.9058	0.9058	0.9059	-0.0001	-0.0001	-0.0003	-0.0002	-0.0002	-0.0001
		Accuracy	0.8506	0.8502	0.8499	0.8511	0.8486	0.8506	0.8503	-0.0004	-0.0007	0.0005	-0.002	0	-0.0003
		Precision	0.7327	0.7317	0.7306	0.7354	0.7311	0.7334	0.7305	-0.001	-0.0021	0.0027	-0.0016	0.0007	-0.0022
		Recall	0.6131	0.6119	0.6119	0.6112	0.6029	0.6119	0.615	-0.0012	-0.0012	-0.0019	-0.0102	-0.0012	0.0019
		F1	0.6676	0.6664	0.666	0.6676	0.6608	0.6671	0.6678	-0.0012	-0.0016	0	-0.0068	-0.0005	0.0002
		Mcc	0.576	0.5746	0.5738	0.5768	0.5689	0.5758	0.5757	-0.0014	-0.0022	0.0008	-0.0071	-0.0002	-0.0003
		obj	-2224.72	-2224.56	-2224.57	-2224.33	-2223.2	-2223.75	-2223.92	0.16	0.15	0.39	1.52	0.97	0.8
		iter	35752	36151	22590	15987	13240	14034	14275	1.01116	0.631853	0.447164	0.370329	0.392537	0.399278
	0	AUC	0.906	0.9058	0.9059	0.9058	0.9057	0.9058	0.906	-0.0002	-0.0001	-0.0002	-0.0003	-0.0002	0
		Accuracy	0.8506	0.8506	0.8506	0.8514	0.8503	0.8502	0.85	0	0	0.0008	-0.0003	-0.0004	-0.0006
		Precision	0.7327	0.7323	0.7327	0.7373	0.7312	0.7331	0.7322	-0.0004	0	0.0046	-0.0015	0.0004	-0.0005
		Recall	0.6131	0.6138	0.6131	0.6099	0.6138	0.6093	0.6099	0.0007	0	-0.0032	0.0007	-0.0038	-0.0032
		F1	0.6676	0.6678	0.6676	0.6676	0.6674	0.6655	0.6655	0.0002	0	0	-0.0002	-0.0021	-0.0021
		Mcc	0.576	0.5762	0.576	0.5773	0.5754	0.5741	0.5738	0.0002	0	0.0013	-0.0006	-0.0019	-0.0022
		obj	-2224.72	-2224.41	-2224.47	-2224.33	-2223.72	-2223.07	-2223.85	0.31	0.25	0.39	1	1.65	0.87
		iter	37578	33682	21592	16418	13926	12987	14318	0.896322	0.574592	0.436905	0.370589	0.345601	0.381021
australian	1	AUC	0.9393	0.9403	0.9378	0.9318	0.9141	0.9126	0.9202	0.001	-0.0015	-0.0075	-0.0252	-0.0267	-0.0191
		Accuracy	0.8565	0.8565	0.8565	0.8565	0.8565	0.8565	0.8565	0	0	0	0	0	0
		Precision	0.7873	0.7873	0.7873	0.7873	0.7873	0.7873	0.7873	0	0	0	0	0	0
		Recall	0.9283	0.9283	0.9283	0.9283	0.9283	0.9283	0.9283	0	0	0	0	0	0
		F1	0.852	0.852	0.852	0.852	0.852	0.852	0.852	0	0	0	0	0	0
		Mcc	0.7237	0.7237	0.7237	0.7237	0.7237	0.7237	0.7237	0	0	0	0	0	0
		obj	-199.65	-199.25	-198.98	-198.21	-197.78	-198.53	-198.64	0.4	0.67	1.44	1.87	1.12	1.01
		iter	10727	6438	1910	835	493	596	612	0.600168	0.178055	0.077841	0.0459588	0.0555607	0.0570523
	0	AUC	0.9393	0.9397	0.9324	0.9111	0.923	0.9223	0.9316	0.0004	-0.0069	-0.0282	-0.0163	-0.017	-0.0077
		Accuracy	0.8565	0.8565	0.8565	0.8565	0.8565	0.8565	0.8565	0	0	0	0	0	0
		Precision	0.7873	0.7873	0.7873	0.7873	0.7873	0.7873	0.7873	0	0	0	0	0	0
		Recall	0.9283	0.9283	0.9283	0.9283	0.9283	0.9283	0.9283	0	0	0	0	0	0
		F1	0.852	0.852	0.852	0.852	0.852	0.852	0.852	0	0	0	0	0	0
		Mcc	0.7237	0.7237	0.7237	0.7237	0.7237	0.7237	0.7237	0	0	0	0	0	0
		obj	-199.65	-199.25	-199.15	-198.68	-198.33	-198.62	-198.82	0.4	0.5	0.97	1.32	1.03	0.83
		iter	10590	6978	2629	847	542	637	731	0.658924	0.248253	0.0799811	0.0511804	0.0601511	0.0690274
breast	1	AUC	0.9962	0.9962	0.9963	0.9961	0.9962	0.9961	0.9962	0	0.0001	-0.0001	0	-0.0001	0
		Accuracy	0.9707	0.9707	0.9707	0.9707	0.9707	0.9707	0.9707	0	0	0	0	0	0
		Precision	0.9818	0.9818	0.9818	0.9818	0.9818	0.9818	0.9818	0	0	0	0	0	0
		Recall	0.973	0.973	0.973	0.973	0.973	0.973	0.973	0	0	0	0	0	0
		F1	0.9774	0.9774	0.9774	0.9774	0.9774	0.9774	0.9774	0	0	0	0	0	0
		Mcc	0.936	0.936	0.936	0.936	0.936	0.936	0.936	0	0	0	0	0	0
		obj	-46	-45.96	-45.93	-45.89	-45.63	-45.53	-45.78	0.04	0.07	0.11	0.37	0.47	0.22
		iter	212	542	257	196	138	146	150	2.5566	1.21226	0.924528	0.650943	0.688679	0.707547
	0	AUC	0.9962	0.9962	0.9963	0.9963	0.9962	0.9962	0.9962	0	0.0001	0.0001	0	0	0
		Accuracy	0.9707	0.9707	0.9707	0.9707	0.9722	0.9722	0.9722	0	0	0	0.0015	0.0015	0.0015
		Precision	0.9818	0.9818	0.9818	0.9818	0.9819	0.9841	0.9819	0	0	0	0.0001	0.0023	0.0001
		Recall	0.973	0.973	0.973	0.973	0.9752	0.973	0.9752	0	0	0	0.0022	0	0.0022
		F1	0.9774	0.9774	0.9774	0.9774	0.9785	0.9785	0.9785	0	0	0	0.0011	0.0011	0.0011
		Mcc	0.936	0.936	0.936	0.936	0.9391	0.9393	0.9391	0	0	0	0.0031	0.0033	0.0031
		obj	-46	-45.95	-45.99	-45.78	-45.62	-45.87	-45.88	0.05	0.01	0.22	0.38	0.13	0.12
		iter	212	443	329	184	146	160	181	2.08962	1.55189	0.867925	0.688679	0.754717	0.853774
diabetes	1	AUC	0.8388	0.8393	0.839	0.8388	0.8383	0.8378	0.8385	0.0005	0.0002	0	-0.0005	-0.001	-0.0003
		Accuracy	0.776	0.7747	0.7734	0.7747	0.7708	0.7721	0.7721	-0.0013	-0.0026	-0.0013	-0.0052	-0.0039	-0.0039
		Precision	0.7918	0.7904	0.789	0.7904	0.7893	0.7886	0.7897	-0.0014	-0.0028	-0.0014	-0.0025	-0.0032	-0.0021
		Recall	0.89	0.89	0.89	0.89	0.884	0.888	0.886	0	0	0	-0.006	-0.002	-0.004
		F1	0.838	0.8373	0.8365	0.8373	0.834	0.8354	0.8351	-0.0007	-0.0015	-0.0007	-0.004	-0.0026	-0.0029
		Mcc	0.4878	0.4846	0.4813	0.4846	0.4759	0.4784	0.4788	-0.0032	-0.0065	-0.0032	-0.0119	-0.0094	-0.009
		obj	-403.1	-403.03	-402.97	-403	-402.53	-402.44	-402.58	0.07	0.13	0.1	0.57	0.66	0.52
		iter	680	873	612	590	460	475	502	1.28382	0.9	0.867647	0.676471	0.698529	0.738235
	0	AUC	0.8388	0.8392	0.8391	0.8393	0.8384	0.8383	0.839	0.0004	0.0003	0.0005	-0.0004	-0.0005	0.0002
		Accuracy	0.776	0.7747	0.776	0.7747	0.7695	0.7721	0.776	-0.0013	0	-0.0013	-0.0065	-0.0039	0
		Precision	0.7918	0.7904	0.7918	0.7914	0.7858	0.7897	0.7918	-0.0014	0	-0.0004	-0.006	-0.0021	0
		Recall	0.89	0.89	0.89	0.888	0.888	0.886	0.89	0	0	-0.002	-0.002	-0.004	0
		F1	0.838	0.8373	0.838	0.8369	0.8338	0.8351	0.838	-0.0007	0	-0.0011	-0.0042	-0.0029	0
		Mcc	0.4878	0.4846	0.4878	0.48449	0.4718	0.4788	0.4878	-0.0032	0	-0.00331	-0.016	-0.009	0
		obj	-403.1	-403	-403.03	-403	-402.05	-402.8	-402.72	0.1	0.07	0.1	1.05	0.3	0.38
		iter	680	793	687	529	490	502	516	1.16618	1.01029	0.777941	0.720588	0.738235	0.758824
fourclass	1	AUC	0.8266	0.8268	0.8262	0.8265	0.8255	0.8251	0.8261	0.0002	-0.0004	-0.0001	-0.0011	-0.0015	-0.0005
		Accuracy	0.7715	0.7715	0.7715	0.7715	0.7715	0.7726	0.7726	0	0	0	0	0.0011	0.0011
		Precision	0.7455	0.7455	0.7455	0.7477	0.7477	0.7489	0.7489	0	0	0.0022	0.0022	0.0034	0.0034
		Recall	0.544	0.544	0.544	0.5407	0.5407	0.544	0.544	0	0	-0.0033	-0.0033	0	0
		F1	0.629	0.629	0.629	0.6276	0.6276	0.6302	0.6302	0	0	-0.0014	-0.0014	0.0012	0.0012
		Mcc	0.4818	0.4818	0.4818	0.4816	0.4816	0.4845	0.4845	0	0	-0.0002	-0.0002	0.0027	0.0027
		obj	-454.29	-454.27	-454.22	-454.23	-454.12	-454.12	-454.17	0.02	0.07	0.06	0.17	0.17	0.12
		iter	590	917	676	509	450	466	496	1.55424	1.14576	0.862712	0.762712	0.789831	0.840678
	0	AUC	0.8266	0.827	0.8256	0.8272	0.8245	0.8263	0.8257	0.0004	-0.001	0.0006	-0.0021	-0.0003	-0.0009
		Accuracy	0.7715	0.7691	0.7715	0.7691	0.7749	0.7726	0.7726	-0.0024	0	-0.0024	0.0034	0.0011	0.0011
		Precision	0.7455	0.7432	0.7455	0.7432	0.7653	0.7534	0.7467	-0.0023	0	-0.0023	0.0198	0.0079	0.0012
		Recall	0.544	0.5375	0.544	0.5375	0.5309	0.5375	0.5472	-0.0065	0	-0.0065	-0.0131	-0.0065	0.0032
		F1	0.629	0.6238	0.629	0.6238	0.6269	0.6274	0.6316	-0.0052	0	-0.0052	-0.0021	-0.0016	0.0026
		Mcc	0.4818	0.4761	0.4818	0.4761	0.4894	0.4842	0.4847	-0.0057	0	-0.0057	0.0076	0.0024	0.0029
		obj	-454.29	-454.25	-454.22	-454.18	-453.68	-453.8	-454.19	0.04	0.07	0.11	0.61	0.49	0.1
		iter	590	908	625	526	421	458	471	1.53898	1.05932	0.891525	0.713559	0.776271	0.798305
german	1	AUC	0.8165	0.8163	0.8161	0.816	0.8161	0.8157	0.816	-0.0002	-0.0004	-0.0005	-0.0004	-0.0008	-0.0005
		Accuracy	0.789	0.788	0.787	0.786	0.785	0.783	0.784	-0.001	-0.002	-0.003	-0.004	-0.006	-0.005
		Precision	0.6943	0.6947	0.69	0.6886	0.6856	0.6861	0.6858	0.0004	-0.0043	-0.0057	-0.0087	-0.0082	-0.0085
		Recall	0.53	0.5233	0.5267	0.5233	0.5233	0.51	0.5167	-0.0067	-0.0033	-0.0067	-0.0067	-0.02	-0.0133
		F1	0.6011	0.597	0.5974	0.5947	0.5936	0.5851	0.5894	-0.0041	-0.0037	-0.0064	-0.0075	-0.016	-0.0117
		Mcc	0.469	0.4654	0.4638	0.4608	0.4586	0.4514	0.455	-0.0036	-0.0052	-0.0082	-0.0104	-0.0176	-0.014
		obj	-519.05	-518.76	-518.81	-518.48	-517.51	-517.92	-517.59	0.29	0.24	0.57	1.54	1.13	1.46
		iter	13688	9415	5821	4533	3675	3741	3787	0.687829	0.425263	0.331166	0.268483	0.273305	0.276666
	0	AUC	0.8165	0.8163	0.8163	0.8155	0.8154	0.8159	0.8162	-0.0002	-0.0002	-0.001	-0.0011	-0.0006	-0.0003
		Accuracy	0.789	0.787	0.789	0.783	0.785	0.784	0.787	-0.002	0	-0.006	-0.004	-0.005	-0.002
		Precision	0.6943	0.6916	0.6978	0.6781	0.6856	0.6826	0.6933	-0.0027	0.0035	-0.0162	-0.0087	-0.0117	-0.001
		Recall	0.53	0.5233	0.5233	0.5267	0.5233	0.5233	0.52	-0.0067	-0.0067	-0.0033	-0.0067	-0.0067	-0.01
		F1	0.6011	0.5958	0.5981	0.5929	0.5936	0.5925	0.5943	-0.0053	-0.003	-0.0082	-0.0075	-0.0086	-0.0068
		Mcc	0.469	0.4631	0.4677	0.4548	0.4586	0.4563	0.4625	-0.0059	-0.0013	-0.0142	-0.0104	-0.0127	-0.0065
		obj	-519.05	-518.64	-518.69	-518.41	-517.91	-517.98	-517.65	0.41	0.36	0.64	1.14	1.07	1.4
		iter	13454	9367	5495	4576	3663	3842	3742	0.696224	0.408429	0.340122	0.272261	0.285566	0.278133
gisette	1	AUC	1	1	1	1	1	1	1	0	0	0	0	0	0
		Accuracy	1	1	1	1	1	1	1	0	0	0	0	0	0
		Precision	1	1	1	1	1	1	1	0	0	0	0	0	0
		Recall	1	1	1	1	1	1	1	0	0	0	0	0	0
		F1	1	1	1	1	1	1	1	0	0	0	0	0	0
		Mcc	1	1	1	1	1	1	1	0	0	0	0	0	0
		obj	-0.668	-0.668	-0.668	-0.668	-0.668	-0.668	-0.668	0	0	0	0	0	0
		iter	8157	23247	9312	6736	6002	5978	5979	2.84994	1.1416	0.825794	0.73581	0.732867	0.73299
	0	AUC	1	1	1	1	1	1	1	0	0	0	0	0	0
		Accuracy	1	1	1	1	1	1	1	0	0	0	0	0	0
		Precision	1	1	1	1	1	1	1	0	0	0	0	0	0
		Recall	1	1	1	1	1	1	1	0	0	0	0	0	0
		F1	1	1	1	1	1	1	1	0	0	0	0	0	0
		Mcc	1	1	1	1	1	1	1	0	0	0	0	0	0
		obj	-0.668	-0.668	-0.668	-0.668	-0.668	-0.668	-0.668	0	0	0	0	0	0
		iter	8246	17902	7933	6918	6258	6225	6250	2.17099	0.962042	0.838952	0.758913	0.754911	0.757943
heart	1	AUC	0.9282	0.9281	0.9287	0.9296	0.9287	0.9282	0.9296	-0.0001	0.0005	0.0014	0.0005	0	0.0014
		Accuracy	0.8481	0.8444	0.8481	0.8481	0.8519	0.8593	0.8481	-0.0037	0	0	0.0038	0.0112	0
		Precision	0.8376	0.8362	0.8376	0.8376	0.8509	0.8534	0.8376	-0.0014	0	0	0.0133	0.0158	0
		Recall	0.8167	0.8083	0.8167	0.8167	0.8083	0.825	0.8167	-0.0084	0	0	-0.0084	0.0083	0
		F1	0.827	0.822	0.827	0.827	0.8291	0.839	0.827	-0.005	0	0	0.0021	0.012	0
		Mcc	0.6919	0.6843	0.6919	0.6919	0.6992	0.7144	0.6919	-0.0076	0	0	0.0073	0.0225	0
		obj	-92.47	-92.07	-92.33	-92.17	-90.78	-91.34	-91.62	0.4	0.14	0.3	1.69	1.13	0.85
		iter	1010	992	662	525	372	404	410	0.982178	0.655446	0.519802	0.368317	0.4	0.405941
	0	AUC	0.9282	0.9278	0.9284	0.9292	0.9251	0.9278	0.9275	-0.0004	0.0002	0.001	-0.0031	-0.0004	-0.0007
		Accuracy	0.8481	0.8481	0.8444	0.8556	0.8556	0.8593	0.8481	0	-0.0037	0.0075	0.0075	0.0112	0
		Precision	0.8376	0.8435	0.8362	0.8462	0.8584	0.8596	0.8376	0.0059	-0.0014	0.0086	0.0208	0.022	0
		Recall	0.8167	0.8083	0.8083	0.825	0.8083	0.8167	0.8167	-0.0084	-0.0084	0.0083	-0.0084	0	0
		F1	0.827	0.8255	0.822	0.8354	0.8326	0.8376	0.827	-0.0015	-0.005	0.0084	0.0056	0.0106	0
		Mcc	0.6919	0.6917	0.6843	0.7069	0.7068	0.7143	0.6919	-0.0002	-0.0076	0.015	0.0149	0.0224	0
		obj	-92.47	-92.2	-92.07	-92.09	-91.03	-91.14	-91.36	0.27	0.4	0.38	1.44	1.33	1.11
		iter	1010	1097	671	542	380	390	411	1.08614	0.664356	0.536634	0.376238	0.386139	0.406931
ijcnn1	1	AUC	0.918	0.918	0.918	0.9179	0.917	0.9184	0.9179	0	0	-0.0001	-0.001	0.0004	-0.0001
		Accuracy	0.9242	0.9242	0.9241	0.9242	0.9241	0.9241	0.9241	0	-0.0001	0	-0.0001	-0.0001	-0.0001
		Precision	0.7579	0.758	0.7576	0.7581	0.767	0.7565	0.7598	0.0001	-0.0003	0.0002	0.0091	-0.0014	0.0019
		Recall	0.3219	0.3215	0.3215	0.3217	0.314	0.3221	0.3188	-0.0004	-0.0004	-0.0002	-0.0079	0.0002	-0.0031
		F1	0.4518	0.4515	0.4514	0.4517	0.4456	0.4518	0.4491	-0.0003	-0.0004	-0.0001	-0.0062	0	-0.0027
		Mcc	0.4628	0.4626	0.4624	0.4628	0.4604	0.4625	0.4612	-0.0002	-0.0004	0	-0.0024	-0.0003	-0.0016
		obj	-8590.16	-8590.07	-8590.11	-8590.07	-8588.99	-8588.82	-8589	0.09	0.05	0.09	1.17	1.34	1.16
		iter	18382	40443	29635	25599	19150	18694	17842	2.20014	1.61217	1.39261	1.04178	1.01697	0.970623
	0	AUC	0.918	0.9181	0.918	0.9181	0.9181	0.9183	0.9183	0.0001	0	0.0001	0.0001	0.0003	0.0003
		Accuracy	0.9241	0.924	0.9241	0.9241	0.9238	0.9242	0.924	-0.0001	0	0	-0.0003	0.0001	-0.0001
		Precision	0.7574	0.7573	0.7573	0.7572	0.7549	0.7569	0.7562	-0.0001	-0.0001	-0.0002	-0.0025	-0.0005	-0.0012
		Recall	0.3217	0.3202	0.3215	0.3212	0.3179	0.3221	0.3208	-0.0015	-0.0002	-0.0005	-0.0038	0.0004	-0.0009
		F1	0.4515	0.4501	0.4513	0.4511	0.4474	0.4519	0.4505	-0.0014	-0.0002	-0.0004	-0.0041	0.0004	-0.001
		Mcc	0.4625	0.4614	0.4623	0.4621	0.4588	0.4626	0.4614	-0.0011	-0.0002	-0.0004	-0.0037	0.0001	-0.0011
		obj	-8590.16	-8590.05	-8590.1	-8589.94	-8588.84	-8589.73	-8589.18	0.11	0.06	0.22	1.32	0.43	0.98
		iter	16469	45191	30133	23786	18416	20637	18750	2.744	1.82968	1.44429	1.11822	1.25308	1.1385
ionosphere	1	AUC	0.9677	0.9684	0.9681	0.9679	0.9686	0.9688	0.9687	0.0007	0.0004	0.0002	0.0009	0.0011	0.001
		Accuracy	0.9373	0.9373	0.9373	0.9259	0.9345	0.9373	0.9345	0	0	-0.0114	-0.0028	0	-0.0028
		Precision	0.9283	0.9283	0.9283	0.9234	0.9244	0.9356	0.9316	0	0	-0.0049	-0.0039	0.0073	0.0033
		Recall	0.9778	0.9778	0.9778	0.9644	0.9778	0.9689	0.9689	0	0	-0.0134	0	-0.0089	-0.0089
		F1	0.9524	0.9524	0.9524	0.9435	0.9503	0.952	0.9499	0	0	-0.0089	-0.0021	-0.0004	-0.0025
		Mcc	0.8634	0.8634	0.8634	0.8379	0.8572	0.863	0.8567	0	0	-0.0255	-0.0062	-0.0004	-0.0067
		obj	-73.41	-73.41	-73.31	-71.97	-72.02	-72.44	-72.11	0	0.1	1.44	1.39	0.97	1.3
		iter	1016	1489	834	664	555	562	525	1.46555	0.820866	0.653543	0.54626	0.55315	0.516732
	0	AUC	0.9677	0.9674	0.9678	0.9673	0.9651	0.9667	0.965	-0.0003	0.0001	-0.0004	-0.0026	-0.001	-0.0027
		Accuracy	0.9373	0.9288	0.9373	0.9288	0.9316	0.9288	0.9288	-0.0085	0	-0.0085	-0.0057	-0.0085	-0.0085
		Precision	0.9283	0.9274	0.9283	0.9237	0.9277	0.9237	0.9274	-0.0009	0	-0.0046	-0.0006	-0.0046	-0.0009
		Recall	0.9778	0.9644	0.9778	0.9689	0.9689	0.9689	0.9644	-0.0134	0	-0.0089	-0.0089	-0.0089	-0.0134
		F1	0.9524	0.9455	0.9524	0.9458	0.9478	0.9458	0.9455	-0.0069	0	-0.0066	-0.0046	-0.0066	-0.0069
		Mcc	0.8634	0.8441	0.8634	0.8442	0.8505	0.8442	0.8441	-0.0193	0	-0.0192	-0.0129	-0.0192	-0.0193
		obj	-73.41	-73.15	-73.2	-73.13	-72.44	-72.85	-71.91	0.26	0.21	0.28	0.97	0.56	1.5
		iter	770	1348	944	761	560	610	548	1.75065	1.22597	0.988312	0.727273	0.792208	0.711688
rcv1	1	AUC	0.9989	0.9989	0.9989	0.9989	0.9989	0.9989	0.9989	0	0	0	0	0	0
		Accuracy	0.9896	0.9896	0.9896	0.9896	0.9896	0.9896	0.9896	0	0	0	0	0	0
		Precision	0.9896	0.9896	0.9896	0.9896	0.9896	0.9896	0.9897	0	0	0	0	0	0.0001
		Recall	0.9903	0.9903	0.9903	0.9903	0.9903	0.9903	0.9903	0	0	0	0	0	0
		F1	0.9899	0.9899	0.9899	0.9899	0.9899	0.9899	0.99	0	0	0	0	0	0.0001
		Mcc	0.9791	0.9791	0.9791	0.9791	0.9791	0.9791	0.9792	0	0	0	0	0	0.0001
		obj	-1745.67	-1745.66	-1745.65	-1745.62	-1745.63	-1745.6	-1745.59	0.01	0.02	0.05	0.04	0.07	0.08
		iter	11639	41681	17129	12374	11029	9865	9945	3.58115	1.47169	1.06315	0.94759	0.847581	0.854455
	0	AUC	0.9989	0.9989	0.9989	0.9989	0.9989	0.9989	0.9989	0	0	0	0	0	0
		Accuracy	0.9896	0.9896	0.9896	0.9896	0.9896	0.9896	0.9896	0	0	0	0	0	0
		Precision	0.9896	0.9896	0.9896	0.9896	0.9896	0.9897	0.9896	0	0	0	0	0.0001	0
		Recall	0.9903	0.9903	0.9903	0.9903	0.9903	0.9903	0.9903	0	0	0	0	0	0
		F1	0.9899	0.9899	0.9899	0.9899	0.9899	0.99	0.9899	0	0	0	0	0.0001	0
		Mcc	0.9791	0.9791	0.9791	0.9791	0.9791	0.9792	0.9791	0	0	0	0	0.0001	0
		obj	-1745.67	-1745.66	-1745.65	-1745.64	-1745.55	-1745.58	-1745.61	0.01	0.02	0.03	0.12	0.09	0.06
		iter	11650	38114	16388	13014	9242	9419	10457	3.27159	1.4067	1.11708	0.793305	0.808498	0.897597
sonar	1	AUC	0.9495	0.9491	0.9475	0.9467	0.9489	0.9459	0.9482	-0.0004	-0.002	-0.0028	-0.0006	-0.0036	-0.0013
		Accuracy	0.8942	0.8894	0.8894	0.8894	0.8942	0.899	0.8894	-0.0048	-0.0048	-0.0048	0	0.0048	-0.0048
		Precision	0.8641	0.8558	0.8558	0.8558	0.8641	0.8654	0.8558	-0.0083	-0.0083	-0.0083	0	0.0013	-0.0083
		Recall	0.9175	0.9175	0.9175	0.9175	0.9175	0.9278	0.9175	0	0	0	0	0.0103	0
		F1	0.89	0.8856	0.8856	0.8856	0.89	0.8955	0.8856	-0.0044	-0.0044	-0.0044	0	0.0055	-0.0044
		Mcc	0.7896	0.7806	0.7806	0.7806	0.7896	0.7999	0.7806	-0.009	-0.009	-0.009	0	0.0103	-0.009
		obj	-65.67	-65.62	-65.48	-65.49	-65.21	-64.79	-65	0.05	0.19	0.18	0.46	0.88	0.67
		iter	1492	1716	1035	687	544	478	473	1.15013	0.6937	0.460456	0.364611	0.320375	0.317024
	0	AUC	0.9496	0.9501	0.9475	0.9464	0.9492	0.9455	0.9439	0.0005	-0.0021	-0.0032	-0.0004	-0.0041	-0.0057
		Accuracy	0.8942	0.8894	0.8894	0.8894	0.899	0.899	0.8846	-0.0048	-0.0048	-0.0048	0.0048	0.0048	-0.0096
		Precision	0.8641	0.8558	0.8558	0.8558	0.8654	0.8585	0.8476	-0.0083	-0.0083	-0.0083	0.0013	-0.0056	-0.0165
		Recall	0.9175	0.9175	0.9175	0.9175	0.9278	0.9381	0.9175	0	0	0	0.0103	0.0206	0
		F1	0.89	0.8856	0.8856	0.8856	0.8955	0.8966	0.8812	-0.0044	-0.0044	-0.0044	0.0055	0.0066	-0.0088
		Mcc	0.7896	0.7806	0.7806	0.7806	0.7999	0.8013	0.7717	-0.009	-0.009	-0.009	0.0103	0.0117	-0.0179
		obj	-65.67	-65.57	-65.43	-65.49	-64.97	-65.02	-64.88	0.1	0.24	0.18	0.7	0.65	0.79
		iter	1397	1516	929	701	489	448	440	1.08518	0.664996	0.50179	0.350036	0.320687	0.314961
splice	1	AUC	0.9173	0.9165	0.9164	0.9169	0.9165	0.9173	0.9162	-0.0008	-0.0009	-0.0004	-0.0008	0	-0.0011
		Accuracy	0.842	0.84	0.842	0.845	0.841	0.84	0.844	-0.002	0	0.003	-0.001	-0.002	0.002
		Precision	0.8671	0.8665	0.8716	0.8724	0.8698	0.868	0.8737	-0.0006	0.0045	0.0053	0.0027	0.0009	0.0066
		Recall	0.8201	0.8162	0.8143	0.8201	0.8143	0.8143	0.8162	-0.0039	-0.0058	0	-0.0058	-0.0058	-0.0039
		F1	0.8429	0.8406	0.842	0.8455	0.8412	0.8403	0.844	-0.0023	-0.0009	0.0026	-0.0017	-0.0026	0.0011
		Mcc	0.6853	0.6815	0.6859	0.6916	0.6838	0.6817	0.69	-0.0038	0.0006	0.0063	-0.0015	-0.0036	0.0047
		obj	-375.19	-374.55	-374.56	-374.31	-373.25	-374.02	-373.51	0.64	0.63	0.88	1.94	1.17	1.68
		iter	95972	19779	11627	8079	6486	6847	6620	0.206091	0.12115	0.0841808	0.0675822	0.0713437	0.0689785
	0	AUC	0.9173	0.9164	0.9169	0.9156	0.9166	0.9163	0.9168	-0.0009	-0.0004	-0.0017	-0.0007	-0.001	-0.0005
		Accuracy	0.842	0.845	0.843	0.843	0.841	0.844	0.841	0.003	0.001	0.001	-0.001	0.002	-0.001
		Precision	0.8671	0.8724	0.8719	0.8719	0.8698	0.8737	0.8698	0.0053	0.0048	0.0048	0.0027	0.0066	0.0027
		Recall	0.8201	0.8201	0.8162	0.8162	0.8143	0.8162	0.8143	0	-0.0039	-0.0039	-0.0058	-0.0039	-0.0058
		F1	0.8429	0.8455	0.8432	0.8432	0.8412	0.844	0.8412	0.0026	0.0003	0.0003	-0.0017	0.0011	-0.0017
		Mcc	0.6853	0.6916	0.6878	0.6878	0.6838	0.69	0.6838	0.0063	0.0025	0.0025	-0.0015	0.0047	-0.0015
		obj	-375.19	-374.08	-374.11	-373.89	-373.32	-373.77	-373.7	1.11	1.08	1.3	1.87	1.42	1.49
		iter	38987	18752	11058	7562	6501	6845	6785	0.480981	0.283633	0.193962	0.166748	0.175571	0.174032
w1a	1	AUC	0.9755	0.9759	0.9757	0.9757	0.9757	0.9756	0.9754	0.0004	0.0002	0.0002	0.0002	0.0001	-0.0001
		Accuracy	0.9927	0.9927	0.9927	0.9927	0.9927	0.9927	0.9927	0	0	0	0	0	0
		Precision	0.9821	0.9821	0.9821	0.9821	0.9821	0.9821	0.9821	0	0	0	0	0	0
		Recall	0.7639	0.7639	0.7639	0.7639	0.7639	0.7639	0.7639	0	0	0	0	0	0
		F1	0.8594	0.8594	0.8594	0.8594	0.8594	0.8594	0.8594	0	0	0	0	0	0
		Mcc	0.8628	0.8628	0.8628	0.8628	0.8628	0.8628	0.8628	0	0	0	0	0	0
		obj	-62.92	-62.89	-62.91	-62.9	-62.85	-62.89	-62.89	0.03	0.01	0.02	0.07	0.03	0.03
		iter	2565	9030	5034	3529	1835	1949	2224	3.52047	1.96257	1.37583	0.7154	0.759844	0.867057
	0	AUC	0.9755	0.9755	0.9758	0.9759	0.9766	0.9758	0.9734	0	0.0003	0.0004	0.0011	0.0003	-0.0021
		Accuracy	0.9927	0.9927	0.9927	0.9927	0.9927	0.9927	0.9927	0	0	0	0	0	0
		Precision	0.9821	0.9821	0.9821	0.9821	0.9821	0.9821	0.9821	0	0	0	0	0	0
		Recall	0.7639	0.7639	0.7639	0.7639	0.7639	0.7639	0.7639	0	0	0	0	0	0
		F1	0.8594	0.8594	0.8594	0.8594	0.8594	0.8594	0.8594	0	0	0	0	0	0
		Mcc	0.8628	0.8628	0.8628	0.8628	0.8628	0.8628	0.8628	0	0	0	0	0	0
		obj	-62.92	-62.89	-62.89	-62.79	-62.8	-62.86	-62.85	0.03	0.03	0.13	0.12	0.06	0.07
		iter	2547	8436	4326	2222	1691	1781	1737	3.31213	1.69847	0.872399	0.663918	0.699254	0.681979
w5a	1	AUC	0.9632	0.9632	0.9638	0.9632	0.9625	0.9653	0.9626	0	0.0006	0	-0.0007	0.0021	-0.0006
		Accuracy	0.9889	0.9887	0.9888	0.9887	0.9887	0.9889	0.9887	-0.0002	-0.0001	-0.0002	-0.0002	0	-0.0002
		Precision	0.9524	0.9424	0.9474	0.9424	0.9424	0.9524	0.9424	-0.01	-0.005	-0.01	-0.01	0	-0.01
		Recall	0.6406	0.6406	0.6406	0.6406	0.6406	0.6406	0.6406	0	0	0	0	0	0
		F1	0.766	0.7627	0.7643	0.7627	0.7627	0.766	0.7627	-0.0033	-0.0017	-0.0033	-0.0033	0	-0.0033
		Mcc	0.7762	0.772	0.7741	0.772	0.772	0.7762	0.772	-0.0042	-0.0021	-0.0042	-0.0042	0	-0.0042
		obj	-291.68	-291.55	-291.6	-291.6	-291.37	-290.15	-291.29	0.13	0.08	0.08	0.31	1.53	0.39
		iter	15422	31105	13388	10568	6514	5906	5858	2.01692	0.86811	0.685255	0.422384	0.382959	0.379847
	0	AUC	0.9632	0.9636	0.9632	0.9633	0.9632	0.9623	0.9626	0.0004	0	0.0001	0	-0.0009	-0.0006
		Accuracy	0.9889	0.9888	0.9887	0.9888	0.9889	0.9888	0.9887	-0.0001	-0.0002	-0.0001	0	-0.0001	-0.0002
		Precision	0.9524	0.9427	0.9424	0.9474	0.9476	0.9474	0.9424	-0.0097	-0.01	-0.005	-0.0048	-0.005	-0.01
		Recall	0.6406	0.6441	0.6406	0.6406	0.6441	0.6406	0.6406	0.0035	0	0	0.0035	0	0
		F1	0.766	0.7653	0.7627	0.7643	0.7669	0.7643	0.7627	-0.0007	-0.0033	-0.0017	0.0009	-0.0017	-0.0033
		Mcc	0.7762	0.7743	0.772	0.7741	0.7764	0.7741	0.772	-0.0019	-0.0042	-0.0021	0.0002	-0.0021	-0.0042
		obj	-291.68	-291.53	-291.55	-291.46	-291.39	-291.4	-291.31	0.15	0.13	0.22	0.29	0.28	0.37
		iter	15511	25969	13074	8879	6630	6373	5838	1.67423	0.842886	0.572432	0.427439	0.41087	0.376378
